# Supplementary material for: Investigation of the co-identification of hexogen and pentrite as particles and co-adsorbed on copper oxide nanoparticles by using nanocalorimetry
Source: Royal Society of Chemistry journal article supplement (doi:10.1039/c6ay01610c), 2016-01-01
Supplement: c6ay01610c1.pdf [file c6ay01610c1.pdf]

**ESI videos captions**

ESI Video S1. Recording of the RDX (lower side of the membrane) and PETN (upper side of the membrane) particles behaviour when deposited together on the nanocalorimetry membrane. The video was obtained when heating the membrane at a rate of 3000 K/s.

ESI Video S2. Recording of the CuO nanoparticles behaviour when previously subjected to a 3:2 RDX to PETN molar concentration ratio in air. The video was obtained when heating the membrane at a rate of 3000 K/s.

ESI Video S3. Recording of the CuO nanoparticles behaviour when previously subjected to a 1:9 RDX to PETN molar concentration ratio in air. The video was obtained when heating the membrane at a rate of 3000 K/s.
